# Supplementary material for: 4-Fluorinatedl-lysine analogs as selective i-NOS inhibitors: methodology for introducing fluorine into the lysine side chain
Source: Royal Society of Chemistry journal article supplement (doi:10.1039/b307563j), 2003-01-01
Supplement: b307563j.doc [file b307563j.doc]

# Supplementary data

The following information gives the details of the coordinates held at the PDB for compound **12**. The PDB ID Code is 1R35 for SC-83841 and MiNOS.
